# Supplementary material for: Yttrium and europium separation by solvent extraction with undiluted thiocyanate ionic liquids
Source: Royal Society of Chemistry journal article supplement (doi:10.1039/c8ra09797f), 2019-01-01
Supplement: c8ra09797f1.pdf [file c8ra09797f1.pdf]

## **Yttrium and europium separation by solvent extraction with undiluted thiocyanate ionic liquids**

Raju Banda, Federica Forte, Bieke Onghena and Koen Binnemans\*

Electronic Supporting Information (ESI)

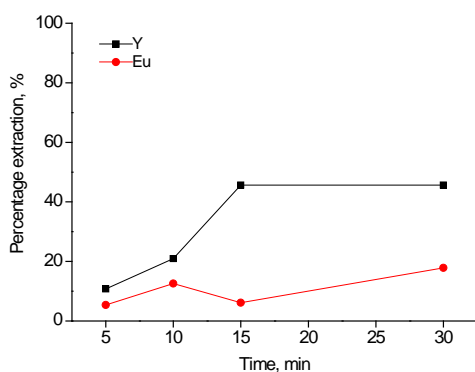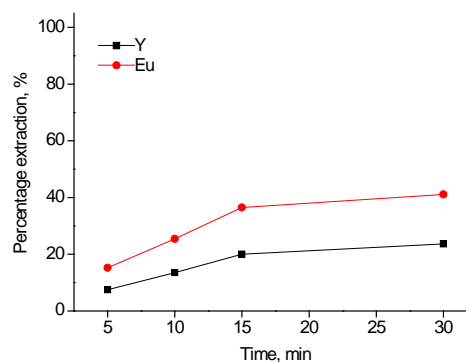

Fig. S1 Extraction of Y(III) and Eu(III) with the ionic liquid [C101][SCN] (left) and [A336][SCN] (right) as a function of time (Aqueous phase:  $[\text{CaCl}_2] = 4 \text{ mol L}^{-1}$ ,  $[\text{Y(III)}] = 3145 \text{ mg L}^{-1}$ ,  $[\text{Eu(III)}] = 215 \text{ mg L}^{-1}$ ; O/A = 1:1,  $T = 30 \text{ }^\circ\text{C}$ ).

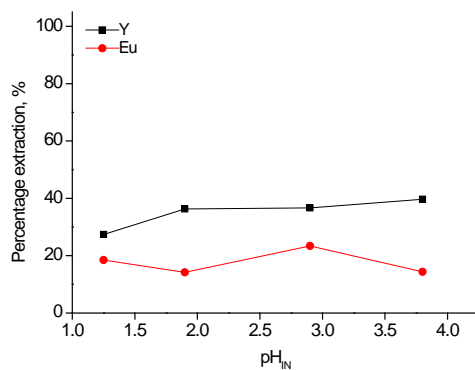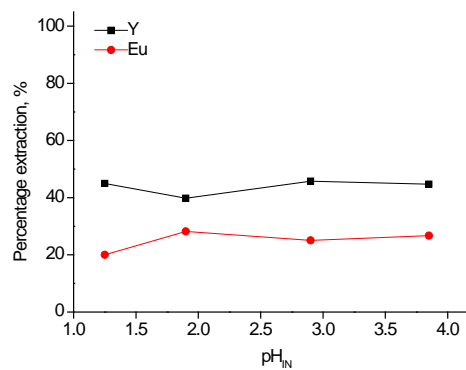

Fig. S2 Extraction of Y(III) and Eu(III) with the ionic liquid [C101][SCN] (left) and [A336][SCN] (right) as a function of the initial pH (Aqueous phase:  $[\text{CaCl}_2] = 4 \text{ mol L}^{-1}$ ,  $[\text{Y(III)}] = 3145 \text{ mg L}^{-1}$ ,  $[\text{Eu(III)}] = 215 \text{ mg L}^{-1}$ ; O/A = 1:1,  $T = 30 \text{ }^\circ\text{C}$ ,  $t = 30 \text{ min}$ ).

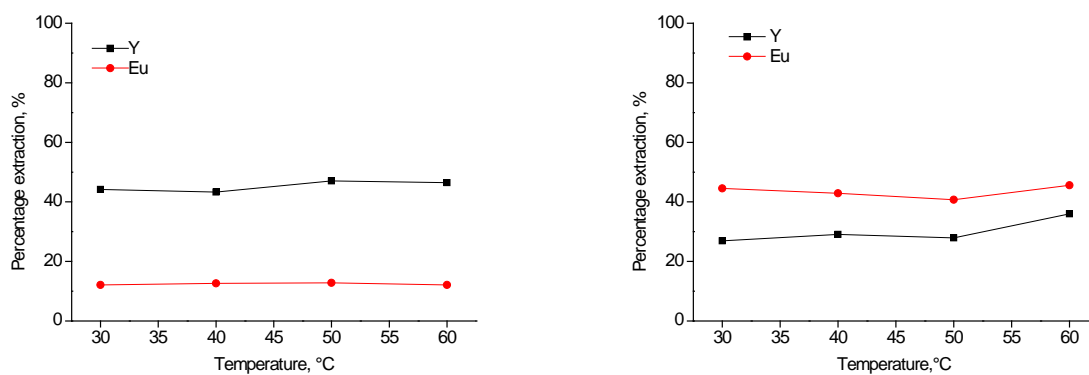

Fig. S3 Extraction of Y(III) and Eu(III) with the ionic liquid [C101][SCN] (left) and [A336][SCN] (right) as a function of temperature (Aqueous phase:  $[CaCl_2] = 4 \text{ mol L}^{-1}$ ,  $[Y(III)] = 3145 \text{ mg L}^{-1}$ ,  $[Eu(III)] = 215 \text{ mg L}^{-1}$ ; O/A = 1:1,  $t = 30 \text{ min}$ ).

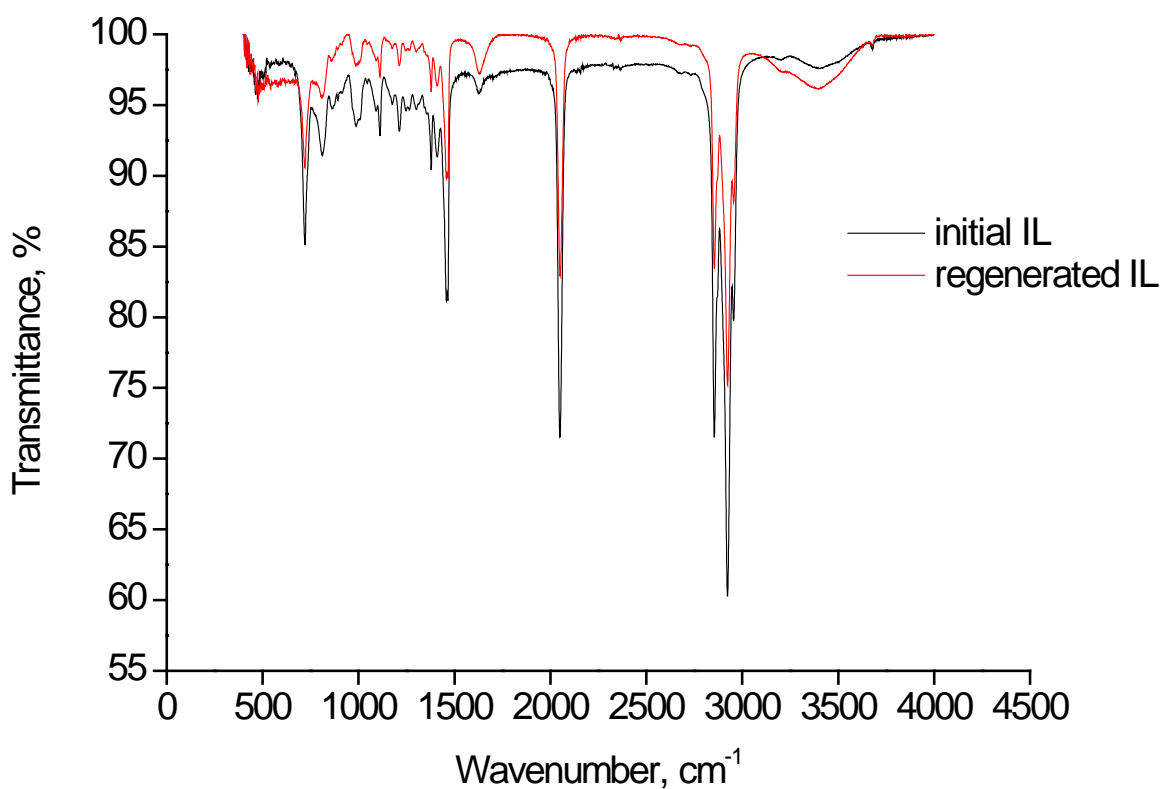

Fig. 4 FTIR spectra of the initial ionic liquid and the regenerated one.
